# Supplementary material for: Spatial variations in sedimentary N-transformation rates in the North Sea (German Bight)
Source: Copernicus journal article supplement (doi:10.5194/bg-17-2839-2020), 2020-05-28
Supplement: Supplementary file 1 [file bg-17-2839-2020-supplement.zip]

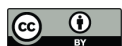

*Supplement of*

## **Spatial variations in sedimentary N-transformation rates in the North Sea (German Bight)**

**Alexander Bratek et al.**

*Correspondence to:* Kirstin Dähnke ([kirstin.daehnke@hzg.de](mailto:kirstin.daehnke@hzg.de))

- [bg-17-2839-2020-supplement-title-page.pdf](#)
- [Bratek\\_et\\_al\\_electronic\\_supplemental\\_200123.xlsx](#)

The copyright of individual parts of the supplement might differ from the CC BY 4.0 License.
