# Supplementary material for: Spatial variations in sedimentary N-transformation rates in the North Sea (German Bight)
Source: Copernicus journal article supplement (doi:10.5194/bg-17-2839-2020), 2020-05-28
Supplement: Supplementary file 2 [file bg-17-2839-2020-supplement.zip]

Archive with 2 entries (2 files):
- Bratek_et_al_electronic_supplemental_200123.xlsx
- bg-17-2839-2020-supplement-title-page.pdf
