# Supplementary material for: Spatial variations in sedimentary N-transformation rates in the North Sea (German Bight)
Source: Copernicus journal article supplement (doi:10.5194/bg-17-2839-2020), 2020-05-28
Supplement: Supplementary file 2 [file bg-17-2839-2020-supplement.zip › Bratek_et_al_electronic_supplemental_200123.xlsx]

## Sheet: Tabelle1
						oxygen				ammonium				nitrate				gross ammonification rate			gross nitrification rate			N2
Cruise	Station	Stable Isotope Label		sediment core	incubation time	flux	linearity	mean	1 sd	flux	linearity	mean	1 sd	flux	linearity	mean	1 sd	rate	mean	1 sd	rate	mean	1 sd	flux	mean	1 sd
		d15NH4+	d15NO3-		hours	mmol m-2 d-1	R²	mmol m-2 d-1	mmol m-2 d-1	mmol N m-2 d-1	R²	mmol N m-2 d-1	mmol N m-2 d-1	mmol N m-2 d-1	R²	mmol N m-2 d-1	mmol N m-2 d-1	mmol N m-2 d-1	mmol N m-2 d-1	mmol N m-2 d-1	mmol N m-2 d-1	mmol N m-2 d-1	mmol N m-2 d-1	mmol N m-2 d-1	mmol N m-2 d-1	mmol N m-2 d-1
HE-471	NOAH-A	-	x	1	24	-11.4243	0.969085	-15.0289	5.7669	1.68865	0.996876	1.6479	0.420658	0.509818	0.832782	0.26606	0.263221				1.24114			0.37485
		-	x	2	24	-11.6089	0.965086			2.19182	0.999247			0.458662	0.480984						1.22481			2.59652
		x	-	3	18	-23.5616	0.985043			1.53226	0.882297			-0.0419449	0.315708			2.3391	2.11995	0.309926		1.23297	0.0115447	1.83472	1.31425	1.08673
		x	-	4	24	-13.5208	0.996709			1.17888	0.701994			0.137704	0.701641			1.9008						0.450894
	NOAH- C	-	x	1	24	-21.9805	0.968024	-25.7811	4.93453	6.61592	0.83361	6.63153	1.37146	1.7294	0.99167	1.12506	0.546494				2.11363			2.86763
		-	x	2	24	-21.6648	0.983796			7.27785	0.885402			1.36706	0.924101						2.02427			1.53545
		x	-	3	24	-27.468	0.860762			4.73094	0.977114			0.940646	0.889812			n.d.	9.53738			2.06895	0.0631863	n.d.	1.91493	0.83073
		x	-	4	24	-32.0112	0.988203			7.90139	0.843317			0.46312	0.817504			9.53738						1.34171
	NOAH-D	-	x	1	24	-35.8268	0.963176	-31.8774	7.12435	0.633481	0.808638	0.496267	0.0921809	0.0445893	0.230478	0.438628	0.393674				n.d.			n.d.
		-	x	2	18	-23.2384	0.969773			0.443083	0.626085			0.6971	0.932932						1.27101			1.18351
		x	-	3	24	-39.2741	0.753536			0.441897	0.474245			0.164599	0.11592			1.92344	3.30164	1.94907		1.27101		0.331494	1.30623	1.04153
		x	-	4	24	-29.1704	0.991794			0.466606	0.29904			0.848226	0.966162			4.67984						2.40367
	NOAH-E	-	x	1	18	-13.9209	0.997806	-27.8098	16.1908	3.58132	0.955843	3.20522	0.566512	1.80453	0.506358	1.16632	0.523188				2.23035			1.41557
		-	x	2	18	-18.0892	0.98636			2.40585	0.793359			1.06124	0.855198						1.24773			0.449974
		x	-	3	24	-50.1106	0.991633			3.63224	0.888641			1.26078	0.906839			5.34477	4.4039	1.33059		1.73904	0.694819	n.d.	1.35472	0.875913
		x	-	4	24	-29.1186	0.997806			3.20147	0.866149			0.538708	0.899005			3.46303						2.19863
